# Supplementary material for: Synthesis of Au@Ag core–shell nanocubes with finely tuned shell thicknesses for surface-enhanced Raman spectroscopic detection
Source: Royal Society of Chemistry journal article supplement (doi:10.1039/d4ra03135k), 2024-01-01
Supplement: d4ra03135k1.pdf [file d4ra03135k1.pdf]

# **Synthesis of Au@Ag Core-Shell Nanocubes with Finely Tuned Shell Thicknesses for Surface-Enhanced Raman Spectroscopic Detection**

*Cuixia Bi,<sup>\*a</sup> Yin Xiaolong,<sup>a</sup> and Hongyan Zhao<sup>a</sup>*

<sup>a</sup>School of Physics and Physical Engineering, Qufu Normal University, Qufu, 273165, P. R. China

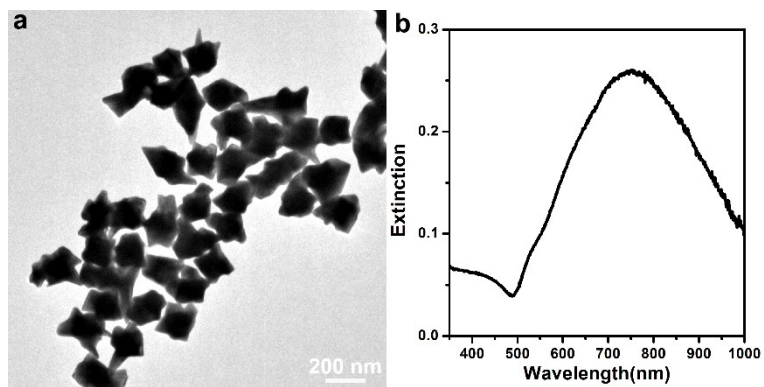

**Figure S1.** TEM images (a) and UV-vis spectra (b) of the Au nanoparticles produced at the seed volume of 1  $\mu$ L. The concentrations of CTAB, HAuCl<sub>4</sub>, and AA in the reaction mixture are 15 mM, 0.19 mM, and 8.83 mM, respectively.

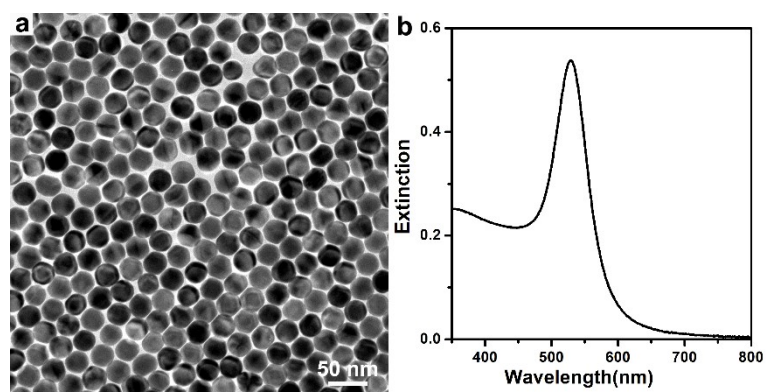

**Figure S2.** TEM images (a) and UV-vis spectra (b) of the Au nanoparticles produced at the seed volume of 150  $\mu$ L. The concentrations of CTAB, HAuCl<sub>4</sub>, and AA in the reaction mixture are 15 mM, 0.19 mM, and 8.83 mM, respectively.

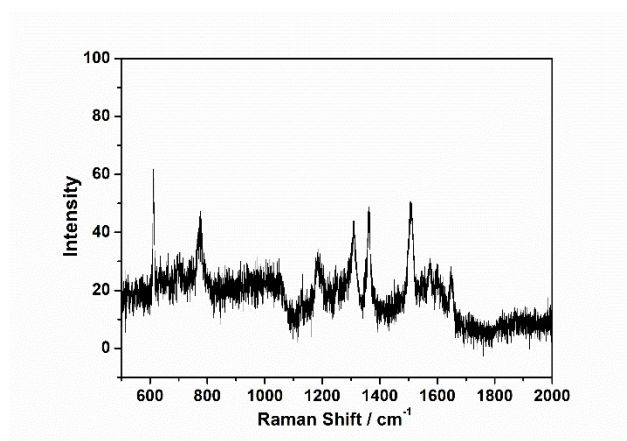

**Figure S3.** The Raman spectra of  $10^{-2}$  M R6G molecules on the blank glass substrate.

The SERS enhancement factor (EF) can be calculated by the equation<sup>1,2</sup>:  $EF = (I_{SERS} \times N_{Raman}) / (I_{Raman} \times N_{SERS})$ , where  $I_{SERS}$  and  $I_{Raman}$  represent the peak intensities in the SERS spectrum with  $1 \times 10^{-6}$  M R6G and the normal Raman spectrum with a  $1 \times 10^{-2}$  M R6G solution, respectively.  $N_{Raman}$  is the total number of probe molecules in the excitation volume for the normal Raman measurements, which can be calculated from the laser spot size, the depth of penetration of the focused beam, the density of R6G, and its molecular mass.  $N_{SERS}$  is the total number of adsorbed molecules on the NPs in the SERS effective area and can be calculated by the following equation:  $N_{SERS} = N_d A_{laser} A_N \rho_b$ .  $N_d$  is the number density of the nanoparticles,  $A_{laser}$  is the area of the laser irradiated on the substrate,  $A_N$  is the projected area of the nanoparticles, and  $\rho_b$  is the binding density of the R6G molecules. Figure S3 show the Raman spectra of  $10^{-2}$  M R6G from the as-prepared substrates. In this experiment, we select the intensity of the predominant peak of R6G at  $613 \text{ cm}^{-1}$  for the EF calculations.

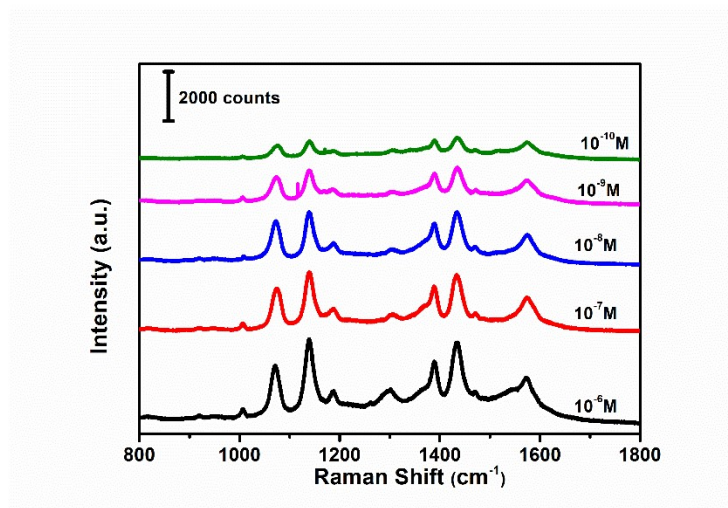

**Figure S4.** SERS spectra of 4-ATP molecules at different concentrations (from  $10^{-6}$  to  $10^{-10}$  M) on Au@Ag<sub>8.4</sub> nanocubes substrates. The excitation laser wavelength for Raman measurements is 633 nm, the laser power is 0.5 mW, and the acquisition time is 2 s.

**Table S1. Details of the size of Au nanoparticles obtained at different amount of seeds and corresponding LSPR band positions.**

| <b>Sample</b> | <b>CTAB (mM)</b> | <b>HAuCl<sub>4</sub> (mM)</b> | <b>AA (mM)</b> | <b>seed (uL)</b> | <b>size (nm)</b> | <b>LSPR band position (nm)</b> |
|---------------|------------------|-------------------------------|----------------|------------------|------------------|--------------------------------|
| Figure 1a     | 15               | 0.19                          | 8.8            | 3                | 102 ± 7          | 625                            |
| Figure 1b     | 15               | 0.19                          | 8.8            | 5                | 90 ± 5           | 598                            |
| Figure 1c     | 15               | 0.19                          | 8.8            | 10               | 55 ± 3           | 549                            |
| Figure 1d     | 15               | 0.19                          | 8.8            | 30               | 42 ± 3           | 537                            |
| Figure 1e     | 15               | 0.19                          | 8.8            | 50               | 38 ± 3           | 530                            |
| Figure 1f     | 15               | 0.19                          | 8.8            | 80               | 35 ± 3           | 529                            |

**Table S2. Details of the Ag shell thicknesses of Au@Ag core-shell nanocubes obtained under different AgNO<sub>3</sub> concentrations and corresponding LSPR band position of Au cores and Ag shells.**

| <b>Sample</b> | <b>AgNO<sub>3</sub><br/>(<math>\mu</math>M)</b> | <b>Ag shell<br/>thicknesses<br/>(nm)</b> | <b>LSPR band<br/>position of Au cores<br/>(nm)</b> | <b>LSPR band<br/>position of Ag shells<br/>(nm)</b> |
|---------------|-------------------------------------------------|------------------------------------------|----------------------------------------------------|-----------------------------------------------------|
| Figure 2a     | 15                                              | 3.6                                      | 532                                                | 408                                                 |
| Figure 2b     | 22                                              | 5.0                                      | 523                                                | 410                                                 |
| Figure 2c     | 29                                              | 6.2                                      | 519                                                | 412                                                 |
| Figure 2d     | 36                                              | 7.3                                      | 513                                                | 416                                                 |
| Figure 2e     | 44                                              | 8.4                                      | 509                                                | 417                                                 |
| Figure 2f     | 51                                              | 10.0                                     | 508                                                | 419                                                 |

- 1 Le Ru, E. C.; Blackie, E.; Meyer, M.; Etchegoin, P. G. Surface enhanced Raman scattering enhancement factors: a comprehensive study. *J. Phys. Chem. C* 2007, **111**, 13794–13803.
- 2 Wu, H. C.; Chen, T. C.; Tsai, H. J.; Chen, C. S. Au nanoparticles deposited on magnetic carbon nanofibers as the ultrahigh sensitive substrate for surface-enhanced Raman scattering: Detections of rhodamine 6G and aromatic amino acids. *Langmuir*, **2018**. 34(47), 14158-14168.
